# Supplementary material for: Somatic Functional Deletions of Upstream Open Reading Frame-Associated Initiation and Termination Codons in Human Cancer
Source: MDPI journal article supplement (doi:10.3390/biomedicines9060618), 2021-05-29
Supplement: s1 [file s1]

Supplementary figures for

**Somatic Functional Deletions of Upstream Open Reading  
Frame-Associated Initiation and Termination Codons in  
Human Cancer**

Lara Jürgens, Felix Manske, Elvira Hubert, Tabea Kischka, Lea Flötotto, Oliver Klaas, Victoria Shabardina, Christoph Schliemann, Wojciech Makalowski and Klaus Wethmar

**Table S1: Sequences of TLSs selected for experimental analysis.**

TLS sequences commercially synthesized (GeneArt®, Invitrogen) for dual luciferase reporter assays. The variant codon affected by individual SNVs is underlined, written in bold letters, and displayed in wild type/mutant configuration. The CDS start codon is written in capital letters.

[illegible]

**Table S2: List of oligonucleotides used for SDM of initiation and termination codons.**

All forward and reverse oligonucleotides (primers) used for site directed mutagenesis (SDM) are given in 5'-3'-sequence direction. The variant codons are written in bold capital letters, with mutated base underlined.

| Induced SNV              | RefSeq_ID      | forward primer                             | reverse primer                           |
|--------------------------|----------------|--------------------------------------------|------------------------------------------|
| BAGE2 ΔCUG.1             | NM_182482.2    | gcccgggggtct <b>CC</b> Ggtatctccgc         | gcgggagatac <b>CG</b> Gagaccccggc        |
| BAGE2 ΔUUG.1             | NM_182482.2    | gagaagggggag <b>CT</b> Ggaggtggag          | ctccagctc <b>CAG</b> ctccccttctc         |
| FANK1 ΔAGG.2/UAG.1       | NM_145235.5    | ctgagagcggt <b>TAC</b> Gagtcgggggttc       | gaaccccgagct <b>CGT</b> Aacgctctcag      |
| FRG2C ΔACG.2             | NM_001124759.5 | cccagccgaggg <b>AT</b> Gtataaaaggcag       | ctgcttttata <b>CAT</b> ccctcggtggg       |
| FRG2C ΔUAG.2             | NM_001124759.5 | gtataaaaggcaggtc <b>TG</b> Gcagactaaccacac | gtgtgggttagtctg <b>CCA</b> gactgctttatac |
| HLA-DRB1<br>ΔAUG.1/GUG.1 | NM_002124.4    | ctataacttga <b>ATAT</b> Ggtggaggggttc      | gaacccctccacc <b>CATAT</b> tccaagttag    |
| HLA-DRB1 ΔCUG.1          | NM_002124.4    | ggttcatagtctcc <b>CTC</b> agtgagacttgc     | gcaagtctcact <b>GAG</b> ggagaactatgaacc  |
| HLA-DRB1 ΔCUG.6          | NM_002124.4    | ctggtctctgc <b>CTG</b> ttctccagcatg        | catgctggagaa <b>CAC</b> gacaggaccag      |
| NDST3 ΔAUG.4             | NM_004784.3    | cttttt <b>ATT</b> gtctctgttggc             | gccaacagaagcac <b>AAT</b> aaaaag         |
| NDST3 ΔUAA.5             | NM_004784.3    | caccatctttctt <b>TAT</b> cttttatggtg       | caccataaaaag <b>ATA</b> aaagaaaagatggtg  |
| TMIGD3 ΔUUG.1            | NM_001081976.2 | ctagcgtggctg <b>CTG</b> gaagcttctg         | cagaagcttc <b>CAC</b> cagccacgctag       |

**Table S3: Summary of SNVs with highest rates of entity-specific recurrence**

# = number. The average dbSNP frequency was calculated using individual frequencies according to the TopMed, ExAC, and GnomAD projects. If none of those contained variation data for individual SNVs "NONE" is displayed.

| entity | most frequent uORF positions w/o dbSNP annotation |                  |                     |                       | most frequent uORF positions with dbSNP annotation |                  |         |                       |                                 |
|--------|---------------------------------------------------|------------------|---------------------|-----------------------|----------------------------------------------------|------------------|---------|-----------------------|---------------------------------|
|        | gene                                              | genomic position | effect              | affected patients (%) | gene                                               | genomic position | effect  | affected patients (%) | dbSNP ID (average frequency, %) |
| BRCA   | ROPN1                                             | chr3:123980570   | GUG>GGG;<br>UGA>GGA | 2.2                   | MELK                                               | chr9: 36599396   | UAA>GAA | 8.6                   | rs374077047 (3.5)               |
|        | RABL2A                                            | chr2:113628561   | AUA>AUC             | 2.2                   |                                                    |                  |         |                       |                                 |
| COAD   | OR2H1                                             | chr6:29461656    | AAG>GAG             | 1.6                   | SYNPR                                              | chr3: 63443357   | GUG>GGG | 4.4                   | rs1183102673 (NONE)             |
| LUAD   | CBWD2                                             | chr2:113437882   | UUG>GUG             | 0.9                   | NBPF20                                             | chr1: 145405250  | UUG>UUU | 3.3                   | rs1412188415 (0.01)             |
|        | POM121                                            | chr7:72890655    | GUG>GGG             | 0.9                   |                                                    |                  |         |                       |                                 |
|        | MRGPRX4                                           | chr11:18173175   | GUG>GGG             | 0.9                   | ZNF7                                               | chr8: 144829396  | CUG>AUG | 3.3                   | rs774406977 (0.1)               |
| PRAD   | VEZF1                                             | chr17:57983388   | UGA>AGA             | 2.0                   | CDC27                                              | chr17: 47156984  | AGG>AAG | 4.6                   | rs772436784 (0.9)               |
| SKCM   | HMGXB4                                            | chr22:35262339   | ACG>ACU             | 2.5                   | CHCHD2                                             | chr7: 56106490   | AUC>AUU | 8.1                   | rs867193277 (0.0008)            |
| LAML   | FDCSP                                             | chr4:70234185    | UAA>AAA             | 6.0                   | NBPF20                                             | chr1: 145405250  | UUG>UUU | 10.1                  | rs1412188415 (0.01)             |

**Table S4: List of recurrent somatic SNVs observed in multiple types of cancer**

The average dbSNP frequency was calculated using individual frequencies according to the TopMed, ExAC, and GnomAD projects. If none of those contained variation data for individual SNVs “NONE” is displayed.

| gene symbol ID     | genomic position | variant          | effect                      | entity (% of patients with somatic mutation)                           | dbSNP ID (average frequency, %) |
|--------------------|------------------|------------------|-----------------------------|------------------------------------------------------------------------|---------------------------------|
| AQP12B             | chr2: 240682856  | AUC>GUC          | loss of aTIS                | COAD (0.9); LUAD (0.9); PRAD (0.6); SKCM (0.6); BRCA (0.2)             | rs760345459 (0.02)              |
| AQP12B             | chr2: 240682857  | AUC>UUC          | loss of aTIS                | LUAD (0.9); COAD (0.7); PRAD (0.6); SKCM (0.4); BRCA (0.2)             | rs766089521 (0.02)              |
| BAGE; BAGE5; BAGE4 | chr21: 10413594  | UUG > CUG        | aTIS>aTIS                   | SKCM (1.9); LUAD (1.6); BRCA (1.3); PRAD (0.8); COAD (0.7)             | rs75318310 (NONE)               |
| HLA-DRB1           | chr6: 32589772   | CUG > GUG        | aTIS>aTIS                   | LUAD (0.5); COAD (0.5); BRCA (0.5); SKCM (0.4); PRAD (0.4)             | rs17204744 (0.003)              |
| TAS2R43            | chr12: 11092279  | AUU>ACU          | loss of aTIS                | COAD (0.9); BRCA (0.6); LUAD (0.5); SKCM (0.4); PRAD (0.4);            | rs369719862 (0.3)               |
| BAGE; BAGE5; BAGE4 | chr21: 10413537  | CUG>CCG          | loss of aTIS                | COAD (2.0); LUAD (1.4); LAML (1.3); BRCA (1.0); SKCM (0.9); PRAD (0.6) | rs78230864 (NONE)               |
| CDC27              | chr17: 47156984  | AGG>AAG          | aTIS>aTIS                   | PRAD (4.6); SKCM (2.3); LUAD (1.9); LAML (1.3); BRCA (1.1); COAD (0.7) | rs772436784 (0.9)               |
| GRM5               | chr11: 89047888  | UGA>UUA; UUG>UUU | loss of uStop, loss of aTIS | BRCA (3.4); LAML (2.0); LUAD (1.6); COAD (0.9); SKCM (0.4); PRAD (0.4) | rs200235727 (1.2)               |
| HLA-DRB5           | chr6: 32530234   | CUG>CUC          | loss of aTIS                | LAML (3.3); SKCM (2.3); BRCA (1.4); PRAD (1.0); LUAD (0.9); COAD (0.9) | rs3179203 (1.6)                 |
| LYZL2              | chr10: 30629668  | AAG>AGG; UAA>UAG | aTIS>aTIS; uStop>uStop      | COAD (3.2); SKCM (2.8); LAML (2.0); PRAD (2.0); BRCA (1.8); LUAD (1.1) | rs74551644 (29.3)               |
| LYZL2              | chr10: 30629732  | UUG>UUA          | loss of aTIS                | PRAD (2.8); SKCM (2.8); COAD (2.5); BRCA (2.5); LAML (2.0); LUAD (1.9) | rs777979230 (0.08)              |
| MSANTD2            | chr11: 124774825 | UUG>UUU          | loss of aTIS                | LUAD (3.0); BRCA (2.3); LAML (2.0); PRAD (1.4); SKCM (0.9); COAD (0.5) | rs75374326 (6.6)                |
| PRSS2              | chr7: 142770963  | AUC>GUC          | loss of aTIS                | COAD (2.7); LAML (2.7); BRCA (1.8); LUAD (0.9); SKCM (0.6); PRAD (0.4) | rs771586111 (NONE)              |
| ST6GALNAC4         | chr9: 127916493  | GUG>GGG          | loss of aTIS                | BRCA (5.2); LUAD (1.6); LAML (1.3); COAD (1.2); PRAD (0.8); SKCM (0.6) | rs375089890 (NONE)              |
| TAS2R43            | chr12: 11092250  | AUU>UUU          | loss of aTIS                | LAML (2.0); LUAD (1.4); PRAD (1.4); COAD (1.2); BRCA (1.2); SKCM (0.6) | rs779232783 (0.3)               |
| TAS2R43            | chr12: 11092256  | UAA>UUA          | loss of uStop               | LAML (2.0); PRAD (1.4); LUAD (1.4); BRCA (1.2); COAD (1.2); SKCM (0.6) | rs748363493 (0.3)               |
| TRMT1L             | chr1: 185150477  | UUG>UUU          | loss of aTIS                | LUAD (2.8); LAML (2.0); BRCA (1.4); SKCM (1.3); PRAD (1.2); COAD (0.5) | rs78652979 (4.8)                |
