# Supplementary material for: Somatic Functional Deletions of Upstream Open Reading Frame-Associated Initiation and Termination Codons in Human Cancer
Source: Biomedicines. 2021 May 29;9(6):618. doi: 10.3390/biomedicines9060618 (PMC8227997; doi:10.3390/biomedicines9060618)
Supplement: Supplementary file 1 [file biomedicines-09-00618-s001.zip]

Archive with 5 entries (5 files):
- Juergens et al_Supplementary Figures.pdf
- Juergens et al_Supplementary Tables.pdf
- Supplementary Figure S1_proofread.tif
- Supplementary Figure S2_proofread.tif
- Supplementary Figure S3_proofread.tif
